# Supplementary material
Source: PubMed Central journal article supplement (PMC3297792)
Supplement: mmc1.pdf [file mmc1.pdf]

## Supporting Information:

### Active Trans-Plasma Membrane Water Cycling in Yeast is Revealed by NMR

Yajie Zhang, Marie Poirier-Quinot, Charles S. Springer, Jr., and James A. Balschi

#### Methods and Materials

**Yeast suspensions with increasing [RR<sub>e</sub>]:** Yeast suspensions at 30% wet wt/vol in minimal medium were bubbled with 95% O<sub>2</sub>/5% CO<sub>2</sub> (n =2) or 95% N<sub>2</sub>/5% CO<sub>2</sub> (n=1) for 1.5 hours before the first <sup>1</sup>H<sub>2</sub>O T<sub>1</sub> IR measurement. In one suspension bubbled with 95% O<sub>2</sub>/5% CO<sub>2</sub>, 10 μmole of the uncoupler of oxidative phosphorylation, 2,4-dinitrophenol, (DNP) was added after 1.5 hour of O<sub>2</sub> bubbling, just prior to the first addition of RR<sub>e</sub>. Serial addition of RR to the yeast suspensions resulted in the following [RR<sub>e</sub>] (mM) values in the medium: 0, 0.3, 0.6, 0.9, 1.2, 1.8, 2.4, 2.9, 3.5, 4.7, 7.0, 9.3, 11.6, 16.1, and 20.5. The total volume increased by 18% by the end of the titration, which was accounted for in calculating [RR<sub>e</sub>]. The IR data acquired at each [RR<sub>e</sub>] were analyzed by 2SX fitting and relaxivity fitting as described below.

**MR Measurements and Data Analyses:** The 64 t<sub>1</sub> delay increments between the 180° (composite) pulse and 90° RF pulses of the IR pulse sequence are as follows (s): 0.001, 0.002, 0.003, 0.004, 0.005, 0.006, 0.007, 0.008, 0.009, 0.01, 0.012, 0.014, 0.016, 0.02, 0.024, 0.028, 0.032, 0.036, 0.04, 0.044, 0.048, 0.052, 0.056, 0.064, 0.072, 0.08, 0.088, 0.096, 0.104, 0.112, 0.12, 0.128, 0.136, 0.144, 0.152, 0.16, 0.17, 0.18, 0.19, 0.2, 0.22, 0.24, 0.26, 0.28, 0.3, 0.32, 0.34, 0.36, 0.4, 0.44, 0.48, 0.52, 0.6, 0.68, 0.76, 0.84, 0.92, 1, 1.2, 1.4, 1.6, 2, 2.4, 2.8.

**Relaxograms:** A 1D Inverse Laplace Transform (ILT) written in Matlab (TwoDLaplaceInverse, Magritek Limited, Wellington New Zealand) of [(M<sub>Z</sub>(∞) – M<sub>Z</sub>(t<sub>1</sub>))/2M<sub>Z</sub>(∞)] produced the longitudinal relaxogram, the apparent relaxation time constant (T<sub>1</sub>') distribution. A two peak relaxogram yielded H<sub>2</sub>O<sub>i</sub> T<sub>1</sub>' (T'<sub>1i</sub>) and H<sub>2</sub>O<sub>e</sub> T<sub>1</sub>' (T'<sub>1e</sub>) values, where the T<sub>1</sub>' was taken as the peak position. The apparent relative water mole fractions were taken as the relative peak area values. Peak positions and areas were determined using Matlab routines (MathWorks Inc, Natick, MA).

**Extracting exchange parameters:** As noted in the main manuscript, two different approaches for extracting exchange parameters from relaxographic data were employed. The first method, “2SX fitting,” substitutes Eqs. (4 – 6) into the right hand side of Eq. (7)

$$[(M_Z(\infty) - M_Z(t_1))/2M_Z(\infty)] = a_L \exp(-t_1 R_{1L}) + a_S \exp(-t_1 R_{1S}) \quad (7) \text{ (main manuscript)}$$

The values of τ<sub>i</sub>, p<sub>i</sub>, and r<sub>1e</sub> with fixed values for R<sub>1i</sub> and R<sub>1e0</sub> are adjusted to match the IR time-course, [(M<sub>Z</sub>(∞) – M<sub>Z</sub>(t<sub>1</sub>))/2M<sub>Z</sub>(∞)], observed at each [RR<sub>e</sub>] value.

The second method, “relaxivity fitting,” adjusts Eq. (4) and/or (5) to match the [RR<sub>e</sub>]-dependence of the R<sub>1L</sub> and/or R<sub>1S</sub> obtained from the relaxograms (1, 2). Matlab was used for the 2SX and relaxivity fittings.

## Results

**Inversion Recovery (IR) Data.** Figure S1 displays plots of the  $t_1$ -dependence of  $\log[(M_Z(\infty) - M_Z(t_1))/2M_Z(\infty)]$  from yeast suspensions with different  $[RR_e]$  values: panel A for the aerobic ( $O_2$ ) condition, and, panel B for the anaerobic ( $N_2$ ) condition. These plots can be characterized with reference to Eq. (7). When  $[RR_e]$  is sufficiently small (certainly below 0.5 mM), the decays exhibit good linearity; the recovery from inversion is monoexponential. When the equilibrium trans-plasma membrane water exchange NMR system is truly in the Fast-eXchange-Limit [FXL] condition, the relaxation is monoexponential and  $R_1 = p_i R_{1i} + p_e R_{1e}$  (2). This is the situation for the 0 mM  $RR_e$  suspensions. If the system remained in the FXL condition, the value of  $R_1$  would increase linearly with  $[RR_e]$  (slope =  $r_{1e}$ ). In the range of  $[RR_e]$  values that the plots remain linear (but  $[RR_e]$ -dependence of  $R_1 < r_{1e}$ ), the systems are in the Fast-eXchange-Regime [FXR] condition (2). When  $[RR_e]$  is sufficiently large ( $> 1.2$  mM, inverted triangles), the plots exhibit nonlinearity; the recovery from inversion is non-monoexponential and the system has clearly departed the FXR and entered the Slow-eXchange-Regime [SXR] condition (2). When  $[RR_e]$  is 3.5 mM and greater, the recovery appears distinctly bi-exponential. At the largest  $[RR_e]$  reached, 20.5 mM, the more slowly decaying component, with slope =  $-R_1' = -R_{1L}$ , represents mostly  $^1H_2O_i$ . A straight line extrapolated through this component's later points, will strike the ordinate at the value of  $a_L$ . The difference between this intercept and the top of the ordinate (unity) is, by definition, equal to  $a_S$ . The  $a_L$  and  $a_S$  are *apparent* population fractions. They are not equal to the intrinsic values,  $p_i$  and  $p_e$ , which must be extracted by 2X analysis. If sufficient  $[RR_e]$  could be reached such that  $a_L = p_i$ , then the system would be in the Slow-eXchange-Limit [SXL] condition [4]. It is also clear from inspecting Fig. S1 that going in the other direction (removing  $RR_e$ )  $a_S$  is the component that vanishes as the system approaches the FXL. This is an important principle of 2SX analyses. Most importantly these plots show the crucial differences between the  $[(M_Z(\infty) - M_Z(t_1))/2M_Z(\infty)]$  curves obtained from aerobic and anaerobic yeast suspensions. This is the active trans-membrane water cycling manifest in the raw data.

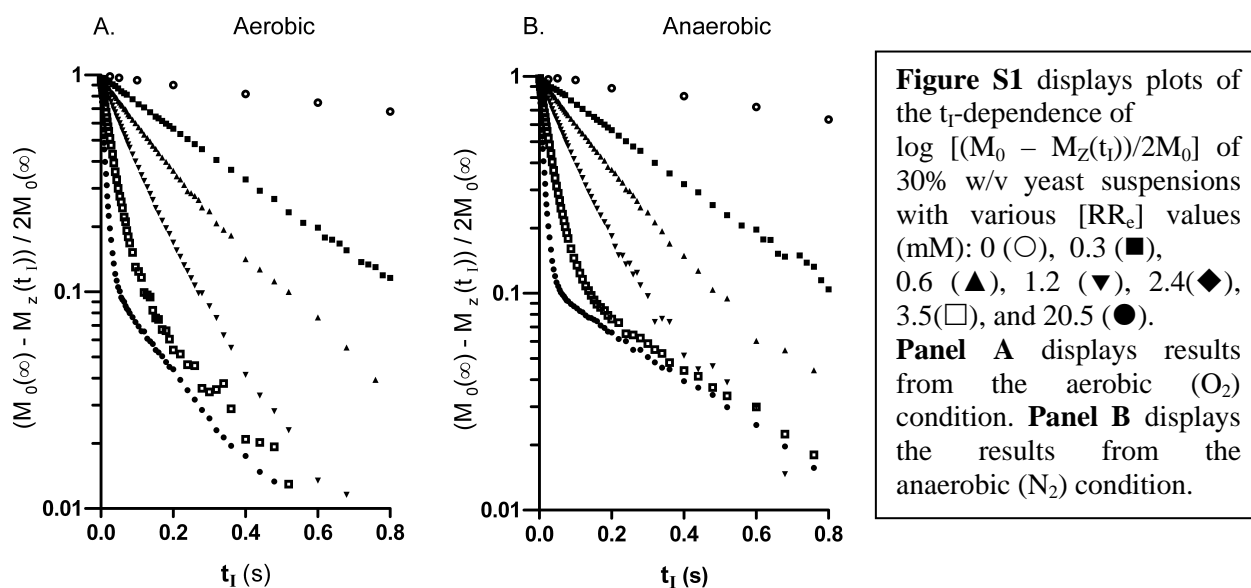

A stacked plot of  $T_1'$  relaxograms, which are the ILTs of the IR time-courses obtained from an aerobic yeast suspension (Fig. S1A) with increasing  $[RR_e]$  ( $[GdDTPA_e^{2-}]$ ), is shown in **Figure S2**. As the  $[GdDTPA_e^{2-}]$  (oblique axis) increases from zero, the single  $^1H_2O$  relaxographic peak shifts to smaller  $T_1'$  values. A second relaxographic peak emerges after  $[RR_e]$  reaches 2.9 mM. The peak, with the larger  $T_1'$  value,  $T_{1L}$ , hardly shifts with increasing  $[RR_e]$ . It represents mostly  $^1H_2O_i$ . The peak with the smaller  $T_1'$  value,  $T_{1S}$ , which continues to shift to smaller  $T_1'$  values, represents much of the  $^1H_2O_e$  (2,3). The Fig. S2 relaxivity plot resembles that reported in Figure 4 of (1). Such results can be examined in the form of a relaxivity plot ( $R_{1S}'$  vs.  $[RR_e]$ ), and be analyzed for water exchange with relaxivity fittings.

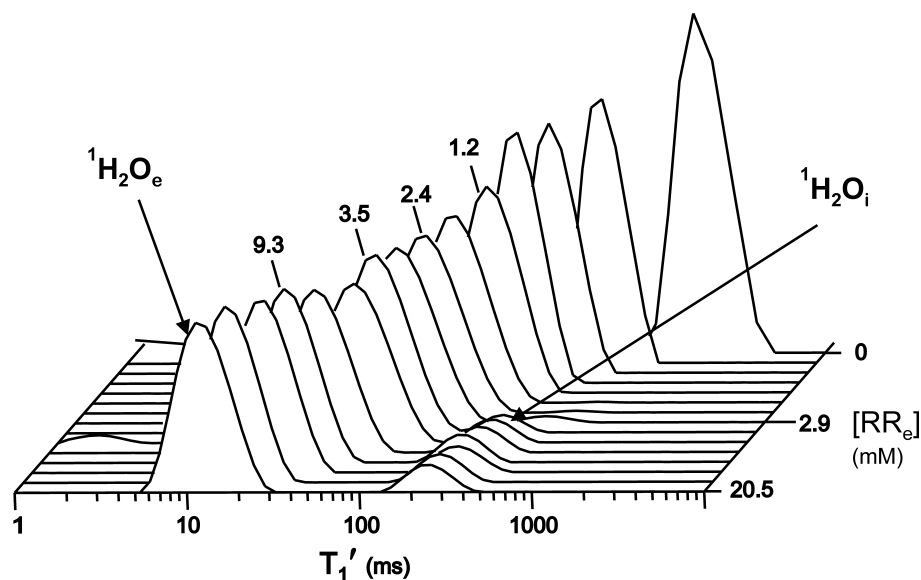

**Figure S2.** A stacked plot of  $^1H_2O$   $T_1$  relaxograms, the Inverse Laplace Transforms (ILT) of the  $(M_0 - M_z(t_i))/2M_0$  data, from a 30% w/v yeast suspension during aerobic ( $O_2$ ) conditions. Aliquots of the RR,  $GdDTPA^{2-}$ , were sequentially added to the suspension. The extracellular RR concentration ( $[RR_e]$ ) is plotted on the oblique axis. The horizontal axis plots the apparent  $T_1$  ( $T_1'$ ) time constant (ms). The peak with the smaller  $T_1$  value,  $T_{1S}$ , represents extracellular  $H_2O$  ( $^1H_2O_e$ ); the peak with the larger  $T_1$  value,  $T_{1L}$ , represents intracellular  $H_2O$  ( $^1H_2O_i$ ).

**Figure S3** displays a relaxivity plot, the  $[GdDTPA_e^{2-}]$ -dependences of the  $R_1'$  values extracted from the relaxograms (Fig. S2 and not shown). The plot for  $GdDTPA^{2-}$  in cell-free (CF) minimal medium is also shown (triangles) for reference. The slope of its fitted (solid) line is the cell-free relaxivity ( $r_{1CF}$ ),  $4.43 (\pm 0.06) s^{-1}mM^{-1}$ . The  $^1H_2O$   $R_1$  values for the small  $[RR_e]$  ( $< 2.9$  mM) suspensions - before  $T_{1S}$ ,  $T_{1L}$  peak separation (Fig. S2) - are plotted as open circles in Fig. S3. They fall on a (dashed) straight line that passes through the subsequent  $R_{1S}$  points, which are essentially the same for the aerobic (open squares) and anaerobic (filled squares) suspensions.

The  $T_{1L}$  peaks are distinct only when  $[RR_e] > 2.9$  mM (Fig. S2). The  $R_{1L}$  values for yeast suspensions bubbled with  $O_2$  (open diamonds in Fig. S3) and  $N_2$  (filled diamonds) are different:  $R_{1L}(O_2) > R_{1L}(N_2)$  (Fig. S3B expands the origin of Fig. S3A). This is a further indication that the kinetics of equilibrium trans-plasma membrane water exchange are different under the aerobic and anaerobic conditions.

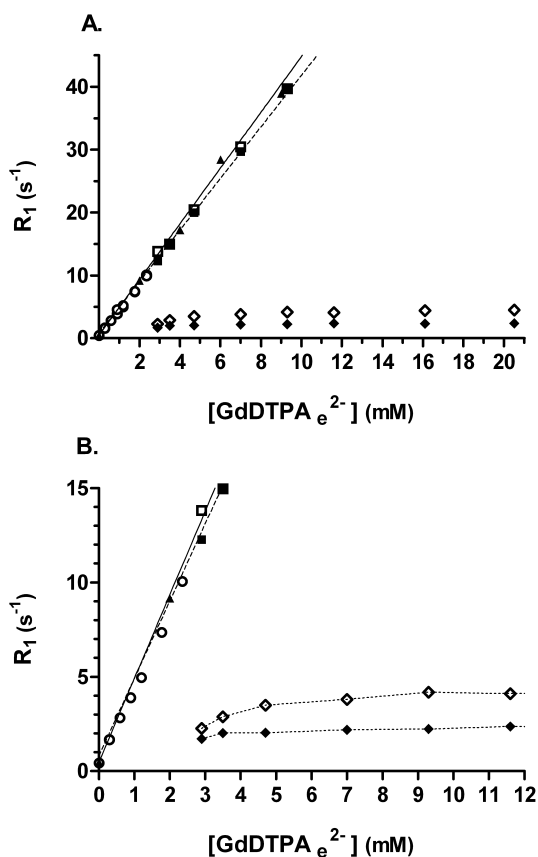

**Figure S3, Panel A:** displays a relaxivity plot, the longitudinal relaxation rate constant ( $R_1 = T_1^{-1}$ ) vs.  $[GdDTPA_e^{2-}]$  for 30% w/v yeast suspensions. The suspension conditions were aerobic (O<sub>2</sub>; (□) = R<sub>1S</sub>; (◇) = R<sub>1L</sub>) and, anaerobic (N<sub>2</sub>; (■) = R<sub>1S</sub>; (◆) = R<sub>1L</sub>). The open circles represent the R<sub>1S</sub> of the T<sub>1S</sub> peaks before emergence of the T<sub>1L</sub> peak; *i.e.*, when  $[RR_e] < 2.9$  mM. The R<sub>1</sub> (▲) measured from cell free GdDTPA<sup>2-</sup> minimal medium solutions are also shown; the slope of the fitted line, the cell free relaxivity ( $r_{1CF}$ ) equals  $4.43 \pm 0.06$  s<sup>-1</sup> mM<sup>-1</sup>.

**Panel B** is an expansion of the panel A origin. The intracellular H<sub>2</sub>O (H<sub>2</sub>O<sub>i</sub>) R<sub>1</sub> values of the yeast suspension during aerobic conditions (◇) are greater than those of the yeast suspension during anaerobic conditions (◆).

**2SX Fitting and Relaxivity Analyses of IR data:** An example of 2SX fitting method is shown in **Figure 1B**. This is the best fitted curve for the IR data set obtained from an anaerobic suspension of yeast with 9.3 mM GdDTPA<sub>e</sub><sup>2-</sup>, the  $[RR_e]$  used for results in the main text. As is evident, the 2SX fitting approach involves fitting individual data sets, each a single  $[RR_e]$  IR measurement. In contrast, the relaxivity fitting method involves fitting either R<sub>1L</sub>, Eq. (4) and/or R<sub>1S</sub>, Eq. (5) to the appropriate R<sub>1</sub> measurements over a range of  $[RR_e]$  values. **Figure S4** displays the relaxivity fittings of the anaerobic yeast suspension RR<sub>e</sub> titration relaxogram data (Fig. S2).

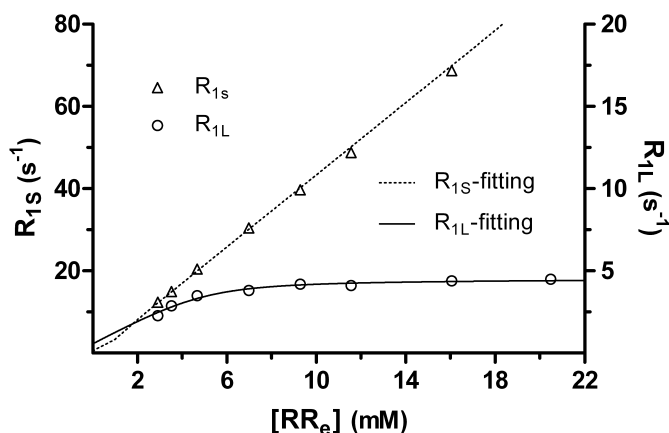

**Figure S4.** Relaxivity fitting of the yeast suspension relaxogram R<sub>1</sub> values, see Fig. S2. R<sub>1S</sub> is plotted on left ordinate; R<sub>1L</sub> is plotted on the right ordinate (note the scale difference). The parameter values,  $\tau_i$ ,  $p_i$ , and  $r_{1e}$ , returned from the independent R<sub>1S</sub> and R<sub>1L</sub> fittings are reported in **Table S3, O<sub>2</sub>**.

To compare the two fitting methods, the  $RR_e$  titration results from three yeast suspensions were studied. A steady-state value for  $\tau_i$  was assured by bubbling  $O_2$  or  $N_2$  for 1.5 hours before the first IR measurement. In one suspension, DNP was added after 1.5 hour of  $O_2$  bubbling but prior to IR measurements. The first IR measurement was acquired before  $RR_e$  and then RR was serially added to the suspension with an IR measurement after each addition.

The IR data acquired for each measurement when  $[RR_e]$  is sufficiently large ( $\geq 2.9$  mM) that the recovery appears distinctly non-monoexponential were analyzed by 2SX fitting and the  $\tau_i$ ,  $p_i$  and  $r_{1e}$  values returned are listed in **Table S1**. The results from the IR data sets at 2.9, 3.5 and 4.7mM were different from those with  $[RR_e] \geq 7$  mM and deemed unreliable: those at 4.7 mM do not deviate too badly. The results from 2SX fitting with  $[RR_e] \geq 7$  mM were more consistent; and their mean  $\tau_i$ ,  $p_i$  and  $r_{1e}$  values are reported in **Table S2**. It may be that the data for  $[RR_e] < 7$  mM (really,  $< 4.7$  mM) are not sufficiently into the SXR condition: *i.e.*, the recoveries are not sufficiently non-monoexponential.

**Table S1. 2SX fitting** determined  $\tau_i$ ,  $p_i$  and  $r_{1e}$  values from IR time-course measurements of yeast suspensions with  $[RR_e]$  increasing from serial addition.

| $[RR_e]$<br>(mM) | $O_2$           |       |                                     | $O_2$ +DNP      |       |                                     | $N_2$           |       |                                     |
|------------------|-----------------|-------|-------------------------------------|-----------------|-------|-------------------------------------|-----------------|-------|-------------------------------------|
|                  | $\tau_i$<br>(s) | $p_i$ | $r_{1e}$<br>( $s^{-1}$ mM $^{-1}$ ) | $\tau_i$<br>(s) | $p_i$ | $r_{1e}$<br>( $s^{-1}$ mM $^{-1}$ ) | $\tau_i$<br>(s) | $p_i$ | $r_{1e}$<br>( $s^{-1}$ mM $^{-1}$ ) |
| 2.9              | 0.430           | 0.063 | 4.050                               | 0.595           | 0.090 | 4.100                               | 0.416           | 0.113 | 4.395                               |
| 3.5              | 0.440           | 0.067 | 3.960                               | 0.933           | 0.087 | 3.810                               | 0.517           | 0.107 | 4.265                               |
| 4.7              | 0.257           | 0.115 | 4.445                               | 0.466           | 0.106 | 4.190                               | 0.580           | 0.100 | 4.050                               |
| 7.0              | 0.306           | 0.100 | 4.060                               | 0.618           | 0.097 | 3.835                               | 0.513           | 0.110 | 4.140                               |
| 9.3              | 0.291           | 0.097 | 3.875                               | 0.632           | 0.097 | 3.665                               | 0.536           | 0.113 | 4.070                               |
| 11.6             | 0.309           | 0.098 | 3.735                               | 0.595           | 0.099 | 3.540                               | 0.539           | 0.111 | 3.905                               |
| 16.1             | 0.298           | 0.100 | 3.605                               | 0.553           | 0.103 | 3.520                               | 0.625           | 0.112 | 3.560                               |
| 20.5             | 0.275           | 0.105 | 3.685                               | 0.498           | 0.104 | 3.640                               | 0.606           | 0.113 | 3.570                               |

$O_2$  (aerobic conditions),  $O_2$  + DNP (aerobic conditions with 2,4-dinitrophenol, an oxidative phosphorylation uncoupler), and  $N_2$  (anaerobic conditions).

In the (main text) studies where there was only one  $[RR_e]$  value, 9.3 mM, individual IR decays were analyzed by 2SX fitting, and the yeast were studied under aerobic conditions followed by anaerobic conditions (*i.e.*, Fig. 2). The mean  $\tau_i$  value during the final 30 min of  $O_2$  was 335 ( $\pm 36$ ) ms, and, during the final 30 min of  $N_2$  677 ( $\pm 57$ ) ms. These values are also shown in **Table S2**, where comparison of these  $\tau_i$  values to those of the  $[RR_e]$  titration study finds them to be very similar for the  $O_2$  conditions. Those from the titration  $N_2$  (or  $O_2$  +DNP) conditions displayed the same trend, *i.e.*,  $\tau_i$  is larger under  $N_2$  than  $O_2$  conditions but not as much as observed in the constant  $[RR_e]$  studies. This may result from the longer duration of the  $[RR_e]$  titration study.

The  $p_i$  values returned by 2SX fitting were the equal for  $O_2$  and  $O_2$  +DNP conditions while the  $p_i$  under  $N_2$  was 10% greater (**Table S2**). This suggests that the volume increase observed after the switch to anaerobic conditions (**Figure 2B**) is related to an increase in intracellular osmolytes caused by the lack of  $O_2$  itself or, possibly, end products of anaerobic metabolism.

Relaxivity fittings of the  $R_{iL}$  and  $R_{iS}$  [ $RR_e$ ]-dependencies from relaxograms with [ $RR_e$ ]  $\geq 2.9$  mM returned the  $\tau_i$ ,  $p_i$ , and  $r_{1e}$  values listed in **Table S3**. Comparing the values obtained from the  $R_{iL}$  and  $R_{iS}$  fittings for the three yeast suspensions shows the following: 1) the  $\tau_i$  values are generally similar; 2) the  $p_i$  values are quite different with  $p_i$  (from  $R_{iL}$ )  $>$   $p_i$  (from  $R_{iS}$ ); and, 3) the  $r_{1e}$  values for each suspension are also quite different with  $r_{1e}$  (from  $R_{iL}$ )  $\ll$   $r_{1e}$  (from  $R_{iS}$ )  $<$   $r_{1CF}$ .

**Table S2. 2SX fitting** determined average  $\tau_i$ ,  $p_i$  and  $r_{1e}$  values from IR time course measurements.

| Yeast suspensions with [ $RR_e$ ] $\geq 7$ mM | $O_2$                 | $O_2 + DNP$           | $N_2$                 |
|-----------------------------------------------|-----------------------|-----------------------|-----------------------|
| $\tau_i$ (s)                                  | 0.30 ( $\pm 0.01$ )   | 0.58 ( $\pm 0.05$ )   | 0.56 ( $\pm 0.05$ )   |
| $p_i$                                         | 0.100 ( $\pm 0.003$ ) | 0.100 ( $\pm 0.003$ ) | 0.111 ( $\pm 0.001$ ) |
| $r_{1e}$ ( $s^{-1} mM^{-1}$ )                 | 3.79 ( $\pm 0.18$ )   | 3.64 ( $\pm 0.13$ )   | 3.85 ( $\pm 0.27$ )   |
| Yeast suspensions with [ $RR_e$ ] = 9.3 mM    |                       |                       |                       |
| $\tau_i$ (s)                                  | 0.33 ( $\pm 0.03$ )   |                       | 0.68 ( $\pm 0.06$ )   |
| $p_i$                                         | 0.073 ( $\pm 0.007$ ) |                       | 0.093 ( $\pm 0.009$ ) |
| $r_{1e}$ ( $s^{-1} mM^{-1}$ )                 | 3.54 ( $\pm 0.13$ )   |                       | 3.62 ( $\pm 0.08$ )   |
| $R_{li} = R_{1e0} = 0.48 s^{-1}$              |                       |                       |                       |

The mean ( $\pm$  SD) values from 2SX fitting with [ $RR_e$ ]  $\geq 7$  mM are from fitting results shown in Table S1A. The mean ( $\pm$  SD) values from 2SX fitting with [ $RR_e$ ] = 9.3 mM are from Figure 2 ( $\tau_i$  and  $p_i$ ):  $O_2$  from 65 – 125 min and  $N_2$  from 125-265 min in manuscript.

**Table S3. Relaxivity fitting** determined  $\tau_i$ ,  $p_i$  and  $r_{1e}$  values from the [ $RR_e$ ]-dependences of  $R_{iS}$  and  $R_{iL}$  when [ $RR_e$ ]  $\geq 2.9$  mM (the eight Table S1A suspensions).

|                                  | $O_2$            |                  | $O_2 + DNP$      |                  | $N_2$            |                  |
|----------------------------------|------------------|------------------|------------------|------------------|------------------|------------------|
|                                  | $R_{iL}$ fitting | $R_{iS}$ fitting | $R_{iL}$ fitting | $R_{iS}$ fitting | $R_{iL}$ fitting | $R_{iS}$ fitting |
| $\tau_i$ (s)                     | 0.311            | 0.309            | 0.445            | 0.515            | 0.502            | 0.5              |
| $p_i$                            | 0.125            | 0.05             | 0.191            | 0.052            | 0.29             | 0.123            |
| $r_{1e}$ ( $s^{-1} mM^{-1}$ )    | 0.78             | 4.19             | 0.56             | 4.06             | 1                | 4.11             |
| $R_{li} = R_{1e0} = 0.48 s^{-1}$ |                  |                  |                  |                  |                  |                  |

$O_2$  (aerobic conditions),  $O_2 + DNP$  (2,4-dinitrophenol, an uncoupler of oxidative phosphorylation), and  $N_2$  (anaerobic conditions).

Comparing the results from the 2SX (**Table S2**) and relaxivity (**Table S3**) fittings of the RR titration data finds that both methods return similar  $\tau_i$  values for the  $O_2$  condition. The  $p_i$  values returned by 2SX fittings are generally consistent among the three different suspensions and smaller than the  $p_i$  values returned from the relaxivity fitting of the  $R_{iL}$   $RR_e$  dependence. The 2SX fitting values are different from those of the  $R_{iS}$  relaxivity fitting. The  $r_{1e}$  values from the  $R_{iS}$  relaxivity fittings are closer to that of  $r_{1CF}$  ( $4.43 (\pm 0.06) s^{-1} mM^{-1}$ ) than are the values obtained from 2SX fitting, which tend to be somewhat smaller.

Because the relaxivity fitting approach requires multiple [ $RR_e$ ] value suspension preparations (with different [ $RR_e$ ] values), the equilibrium trans-plasma membrane water exchange kinetics in the main text were quantified using the 2SX fitting approach. As noted above, the 2SX fitting

also returned more consistent values for  $\tau_i$ ,  $p_i$ , and  $r_{1e}$ . This is in agreement with our recent finding that, if IR data are of sufficient quality, it is more precise and accurate to fit a model to the data themselves than to their ILTs (4). Even so, relaxograms are invaluable for qualitative visualization (4). To increase accuracy in the studies reported in the main text, a single  $[RR_e]$  value of 9.3 mM was used. The water exchange system is clearly in the SXR with this  $[RR_e]$  value.

It is interesting to note that the mean  $r_{1e}$  value in **Table S2** is  $3.76 \text{ s}^{-1}\text{mM}^{-1}$ ; 15% smaller than the  $r_{1CF}$  value. In an earlier RR titration study of yeasts, we found  $r_{1e}$  to be almost 40% smaller than  $r_{1CF}$  (1). Then and more explicitly later, we suggested that this might reflect exclusion of the  $RR^{2-}$  anion from the yeast periplasm, the space outside the plasma membrane but within the cell wall (2). Our result here is consistent with this hypothesis. Since the cell density employed in (1), 103% (w/v), was more than three times greater than that here, the periplasm would constitute a greater fraction of the aqueous space outside the yeast cell membrane than here. In (2) we noted that  $r_{1e}$  always enters the 2SX model in the  $r_{1e}[RR_e]$  product, Eqs. (4)-(6). Thus,  $r_{1e}[RR_e]$  is analogous to a (thermodynamic) activity of  $RR_e$ , and  $r_{1e}$  to its activity coefficient (2). As such,  $r_{1e}$  can be very sensitive to the nature of the tissue molecular environment of the  $RR_e$ . It can increase when RR interacts with macromolecules that increase the RR molecular rotational correlation time constant (Proton Relaxation Enhancement), and it can decrease when RR is excluded from a tissue space, *e.g.*, for polyelectrostatic reasons, which is still freely accessible to water molecules that can also interact with RR molecules.

**Ebselen treated yeast suspensions:** In the studies shown in Figure 4A (manuscript),  $\tau_i^{-1}$  increased after the  $O_2$  switch in control yeast but not in ebselen-treated suspensions. The  $p_i$  value initially decreased after switching to  $O_2$  in ebselen-treated and control cells (**Figure S5A**). At 16 min., the ebselen-treated cell  $p_i$  had returned to its anaerobic value, while the control cell continued to decrease.

The extracellular pH ( $pH_e$ ) of control and ebselen-treated dense yeast suspensions (30% w/v) were measured before and after the transition from anaerobic ( $t = 0$ ) to aerobic conditions (**Figure S5B**). The  $pH_e$  of control yeast suspension transiently decreases  $\sim 0.4$  pH unit by 6 min after the oxygenation begins and then over the next 14 min it mostly recovers and increases  $\sim 0.4$  pH unit (to  $pH_e = 6.09$ ;  $t = 20$  min). The  $pH_e$  of ebselen-treated dense yeast suspension also decreases  $\sim 0.3$  pH unit, however, over the next 14 min  $pH_e$  continues to decrease another  $\sim 0.7$  pH unit (to  $pH_e = 4.9$ ;  $t = 20$  min). The differences between control and ebselen-treated yeast suspensions are somewhat surprising. We had anticipated that the  $pH_e$  of ebselen-treated yeast suspensions would be relatively stable. Lower cell density ebselen-treated yeast suspensions (4% w/v) indeed do exhibit stable  $pH_e$  upon oxygenation (**Figure S5C**); while the  $pH_e$  of control yeast decreased and then increased. It is possible that the  $pH_e$  decrease is dominated by the efflux of organic anions ( $HCO_3^-$ ) resulting from the aerobic metabolism. Since we find that ATP content and hence ATP production, is equal in ebselen-treated yeast they must also be generating  $CO_2$  (and  $HCO_3^-$ ). It is possible that in the ebselen-treated yeast this may be accompanied by  $H^+$ , or occurs as  $H_2CO_3$ , which would be membrane permeable. Extruded  $H_2CO_3$  would lower the pH of extracellular medium. The  $[H_e^+] > [H_i^+]$  gradient needed to establish the membrane potential is very small.

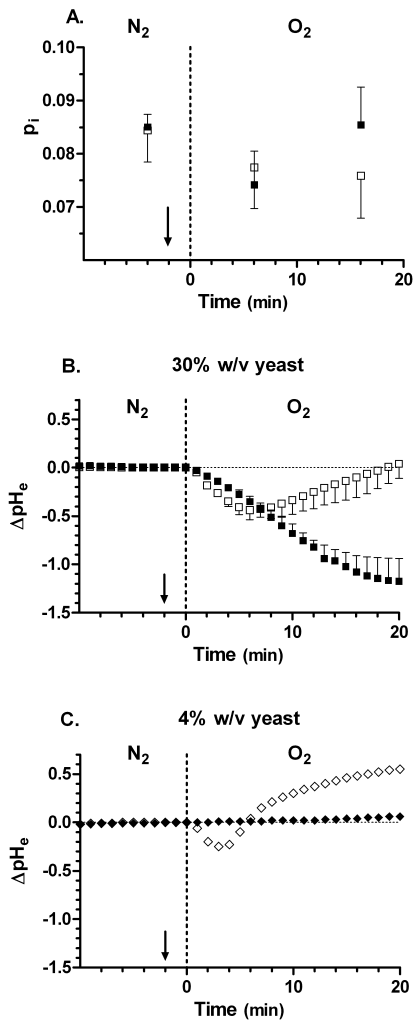

**Figure S5.:** The effect of changing the yeast plasma membrane  $H^+$ -ATPase activity before energizing the cells by switching from  $N_2$  (anaerobic condition) to  $O_2$  (aerobic condition) [at  $t = 0$ , dashed line]. At -2 min (vertical arrows) either DMSO solution of ebselen (2-phenyl-1,2-benzisoseleazol-3(2H)), an inhibitor of the plasma membrane  $H^+$ -ATPase or DMSO alone (control) was added to the suspension.

**Panel A** displays the  $p_i$  ( $\square$ ;  $n=4$ ) for control and ( $\blacksquare$ ;  $n=5$ ) for ebselen-treated 30% w/v yeast suspensions.

**Panel B** displays the  $\Delta pH_e$  ( $\Delta pH_e = [pH_e(t) - \text{mean } pH_e(t = -10 \text{ to } 0)]$ ) for 30% w/v control ( $\square$ ) ( $n=4$ ) and ebselen-treated ( $\blacksquare$ ) ( $n=4$ ) yeast suspensions. Mean ( $\pm$  SD).

**Panel C** displays the  $\Delta pH_e$  for 4% w/v control ( $\diamond$ ) ( $n=1$ ) and ebselen-treated ( $\blacklozenge$ ) ( $n=1$ ) suspensions.

## References:

1. Labadie, C., J. H. Lee, G. Vetek, and C. S. Springer, Jr. 1994. Relaxographic imaging. *J Magn Reson Ser B* 105:99-112.
2. Landis, C. S., X. Li, F. W. Telang, P. E. Molina, I. Palyka, G. Vetek, and C. S. Springer, Jr. 1999. Equilibrium transcytolemmal water-exchange kinetics in skeletal muscle in vivo. *Magn. Reson. Med.* 42:467-478.
3. Li, X., W. Huang, E. A. Morris, L. A. Tudorica, V. E. Seshan, W. D. Rooney, I. Tagge, Y. Wang, J. Xu, and C. S. Springer, Jr. 2008. Dynamic NMR effects in breast cancer dynamic-contrast-enhanced MRI. *Proc Natl Acad Sci USA* 105:17937-17942.
4. Zhang, Y., M. Poirer-Quinot, C. S. Springer, Jr., and J. A. Balschi. 2010. Discrimination of intra- and extracellular  $^{23}\text{Na}^+$  signals in yeast cell suspensions using longitudinal magnetic resonance relaxography. *J Magn Reson* 205:28-37.
